# Supplementary material for: Transcriptomics and metabolomics reveal the mechanisms of enhanced constitutive resistance in rice (Oryza Sativa L.) by silica nanomaterials
Source: Royal Society of Chemistry journal article supplement (doi:10.1039/d3en00504f), 2023-01-01
Supplement: d3en00504f1.pdf [file d3en00504f1.pdf]

## Supporting information

# Transcriptomics and Metabolomics Reveal the Mechanisms of Enhanced Constitutive Resistance in Rice (*Oryza Sativa* L.) by Silica Nanomaterials

Jing Wang<sup>ab</sup>, Xuesong Cao<sup>ab</sup>, Chuanxi Wang<sup>ab</sup>, Zhenggao Xiao<sup>ab</sup>, Feiran Chen<sup>ab</sup>, Yan Feng<sup>ab</sup>, Le Yue<sup>\*ab</sup>, Zhenyu Wang<sup>ab</sup>, Baoshan Xing<sup>c</sup>

<sup>a</sup> *Institute of Environmental Processes and Pollution Control and School of Environment and Civil Engineering, Jiangnan University, Wuxi 214122, China.*

<sup>b</sup> *Jiangsu Engineering Laboratory for Biomass Energy and Carbon Reduction Technology, Wuxi 214122, China.*

<sup>c</sup> *Stockbridge School of Agriculture, University of Massachusetts, Amherst, Massachusetts 01003, United States.*

\*Corresponding author:

Tel.: +86 0510 85911911

E-mail address: leyue@jiangnan.edu.cn (Dr. Le Yue)

**Text S1. Confocal imaging of SiO<sub>2</sub> NMs-FITC in rice plants**

One month-old hydroponic rice seedlings were transferred to 50 mg L<sup>-1</sup> SiO<sub>2</sub> NMs-FITC and Na<sub>2</sub>SiO<sub>3</sub> solution. As the control, the seedlings were grown in DI water and 10 mM FITC solution without Si amendment. These plants were transferred to a green house at 25 °C with the humidity of 60% for seven days. Then leaf discs were cut from leaves and imaged with a confocal microscope under the laser excitation of 488 nm (Nikon A1+ Confocal Superresolution Imaging System, Japan).

**Text S2.** The operating parameters of LC-MS/MS

LC-MS/MS includes a Vanquish UPLC system (Thermo Fisher, USA) and Q Exactive Orbitrap mass spectrometer (Thermo Fisher, USA). 10  $\mu$ L samples were injected onto a Acquity UPLC HSS T3 (2.1 $\times$ 100 mm, 1.8 $\mu$ m) using an 18-min linear gradient at a flow rate of 0.35 mL/min. The eluents in negative/positive mode were eluent A (0.1% v/v formic acid in water) and eluent B (0.1% formic acid in acetonitrile). The solvent gradient was set as follows: 5% B, 0 min; 5% B, 1.5 min; 100% B, 14.0 min; 100% B, 15.5 min; 5% B, 16 min; 5% B, 18 min. The column temperature was 35°C. The method was operated in the positive/negative electrospray ionization switching mode and the ionization parameters setup as follows: spray voltage 3.5 kV(positive), 3 kV(negative), sheath gas flow rate: 35 bar; aux gas flow rate: 15 bar; capillary temperature: 320°C; aux gas heater temperature: 350°C.

A nontarget metabolic profiling analysis was performed in Full/dd-MS<sup>2</sup>. Data were acquired using the following settings: the ion scanning range was 70–1050 m/z; the full MS resolution was 70,000; AGC target value was 1 e<sup>6</sup> and the maximum ion time was 100 ms. The MS/MS resolution was 17,500; AGC target value was 5 e<sup>4</sup>; the maximum ion time was 50 ms; isolation window was 1.5 m/z and the collision energy was 20/40/60 in NCE mode. The mix sample was performed in the Full MS/dd-MS<sup>2</sup> mode by Q Exactive Orbitrap LC-MS/MS using Compound Discoverer 3.3 software to analyze the raw data.

### **Text S3.** Determination of lignin, proline, and total phenolics

Lignin contents were determined using the method of Ke *et al*<sup>1</sup>. The fresh rice roots, stems and leaves were immersed by 1.5 mL 95% ethanol and centrifuged for 10 min for three times, and then oven-dried at 80 °C. A total of 10 mg of dried samples were collected to a test tube, with subsequent adding 1 mL 25% acetyl bromide glacial acetic acid. Then the test tube was heated at 70°C for 30 min. A mixed solution containing 0.9 mL NaOH (2 M), 5 mL glacial acetic acid, 0.1 mL hydroxylamine hydrochloride (7.5 M) and 3 mL glacial acetic acid were added to the test tube. Then the mixed solution was centrifuged at 1000 g for 5 min, and the absorbance of the supernatant was determined at 280 nm to determine the lignin content.

The proline in rice leaves and stems were determined according to Wang *et al*<sup>2</sup>. A total of 500 mg fresh rice leaves and stems were ground in liquid nitrogen with a pestle and mortar and transferred to a glass tube. 5 mL 3% sulfosalicylic acid solution were added into the glass tube, the glass tube was then placed in boiling water bath for 10 minutes. The filtrate is the extract of proline. A volume of 2 mL of the extract was transferred to another clean test tube, and then 2 mL glacial acetic acid and 2 mL acidic ninhydrin reagent were added into the test tube. After shaking, the test tube was heated in a boiling water bath for 30 min. 4 mL toluene was added into the solution after cooling. Then the mixture solution was centrifuged at 3000 g for 5min. The absorbance of the supernatant was determined at 520 nm to determine the proline content.

Total phenolics was determined according to Ainsworth and Gillespie<sup>3</sup>. with some modifications. A total of 20 mg fresh rice leaves and stems were homogenized in an ice-cold mortar and pestle, and 2 mL of ice-cold 95% (v/v) methanol was added to each sample. The samples were incubated at room temperature for 48 h in the dark. Then the samples were centrifuged at 13,000 g for 5 min at room temperature and the supernatant

was collected in a fresh 2 mL microtube. After shaking thoroughly, the assay tubes were incubated at room temperature for 2 h. Finally, 200  $\mu$ L sample was transferred from the assay tube to a clear 96-well microplate and the absorbance of each well was measured at 765 nm. Gallic acid was selected as the standards and 95% (v/v) methanol as the blank.

### **References:**

1. Ke, S.; Luan, X.; Liang, J.; Hung, Y. H.; Hsieh, T. F.; Zhang, X. Q., Rice OsPEX1, an extensin-like protein, affects lignin biosynthesis and plant growth. *Plant Mol Biol* **2019**, *100*, (1-2), 151-161.
2. Wang, Y.; Wang, L.; Ma, C.; Wang, K.; Hao, Y.; Chen, Q.; Mo, Y.; Rui, Y., Effects of cerium oxide on rice seedlings as affected by co-exposure of cadmium and salt. *Environ Pollut* **2019**, *252*, (Pt B), 1087-1096.
3. Ainsworth, E. A.; Gillespie, K. M., Estimation of total phenolic content and other oxidation substrates in plant tissues using Folin-Ciocalteu reagent. *Nat Protoc* **2007**, *2*, (4), 875-877.

**Text S4.** The number of the obtained data and PCA analysis in transcriptome

A total of 73.18 Gb of clean data were obtained from the 6 leaf and 6 stem samples, and each of these samples contained  $\geq 5.43$  Gb of data with Q30 quality scores  $\geq 92.80\%$  (Table S3). The gene expression levels were used to conduct a PCA for each of the biological replicates. The samples from leaves upon NMs were clustered far from each other and the control groups, which indicated that NMs induced significant changes in leaf gene expression (Fig S8a). The Q value  $\leq 0.05$  and Log<sub>2</sub>-fold change (Log<sub>2</sub>FC)  $\geq 2$  or  $\leq -2$  were set as thresholds for differentially expressed genes (DEGs). A total of 4637 DEGs were identified in rice leaves and stems. Briefly, compared to control, 2648 genes (1905 up-regulated and 743 down-regulated) were differentially expressed in rice leaves after SiO<sub>2</sub> NMs exposure, and 1989 genes (1332 upregulated and 657 down-regulated) were differentially expressed in rice stem (Fig S8b). The distribution of up- and downregulated genes was calculated for leaves and stems are presented in a Venn diagram (Fig S8c-d). 270 and 106 genes showed increased and decreased expression at both leaves and roots in response to NMs.

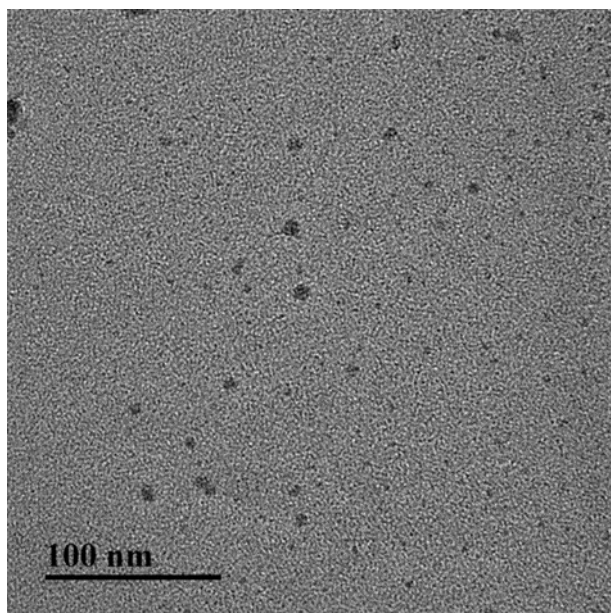

**Fig S1.** TEM image of SiO<sub>2</sub> NMs.

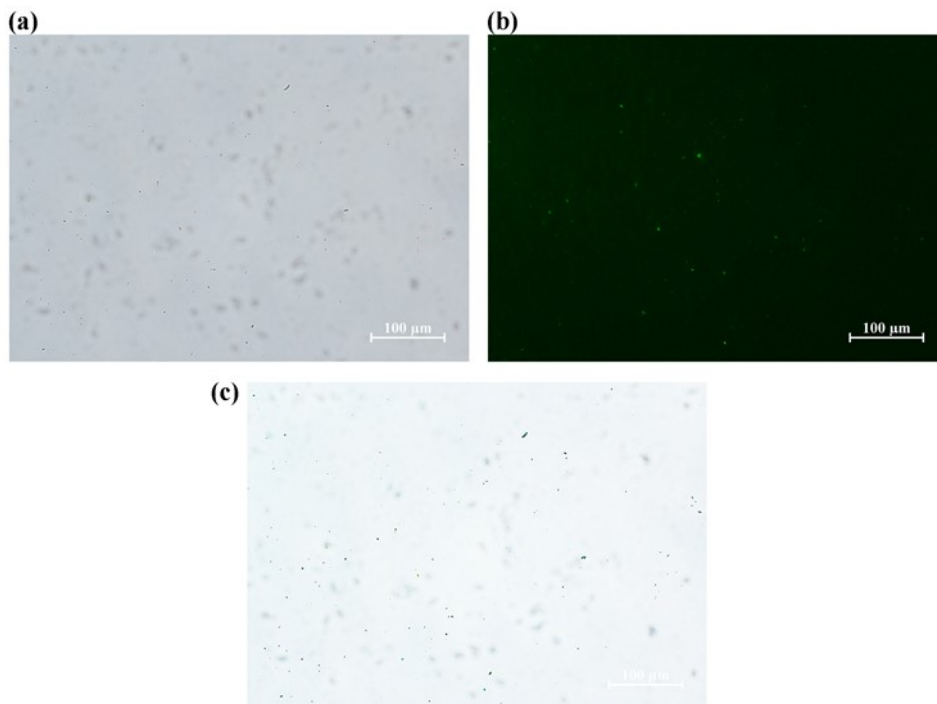

**Fig S2.** Fluorescence microscope images of SiO<sub>2</sub> NMs-FITC suspended in deionized water. (a) Bright field; (b) green channel; (c) the overlapping images of bright-field and green channel.



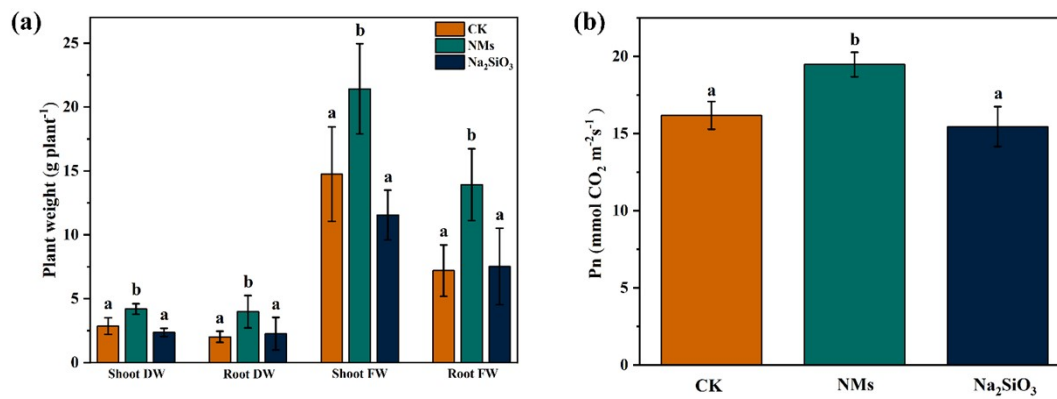

**Fig S3.** Effects of SiO<sub>2</sub> NMs on rice growth. **(a)** Fresh and dry weight of the rice shoot and root in the presence of SiO<sub>2</sub> NMs and Na<sub>2</sub>SiO<sub>3</sub>. **(b)** Net photosynthetic rate (Pn) of rice subjected to 50 mg kg<sup>-1</sup> SiO<sub>2</sub> NMs and Na<sub>2</sub>SiO<sub>3</sub>. The values are given as mean±SD (standard deviation). The significance difference is marked with “a-b” ( $p < 0.05$ ,  $n = 5$ ).

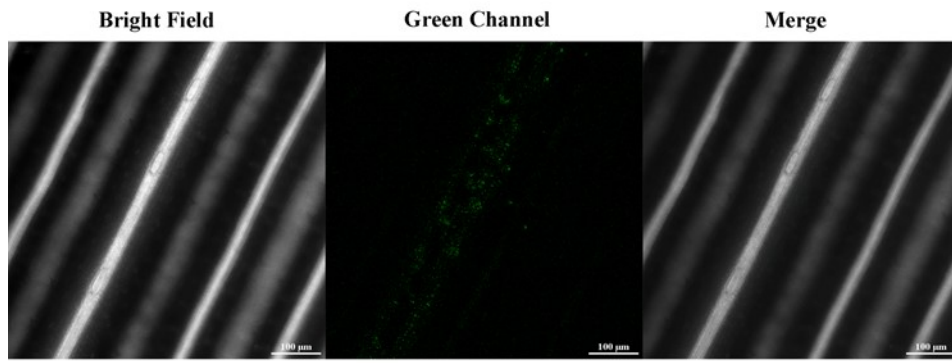

**Fig S4.** Confocal images of rice leaf after treated with 10 mM FITC solution. Scale bar = 100  $\mu\text{m}$ .

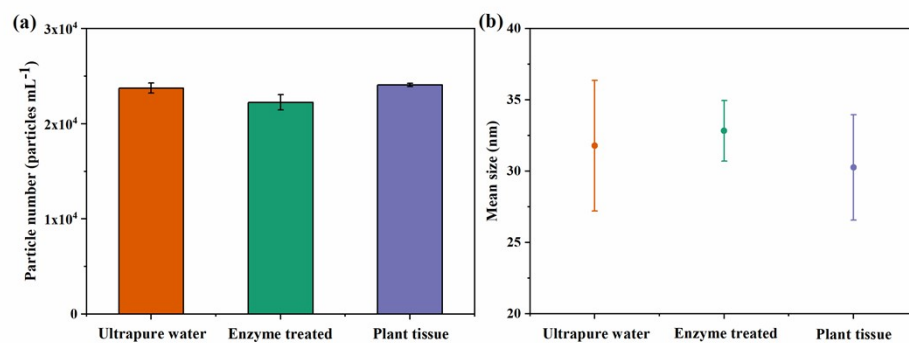

**Fig S5.** Particle number (a) and mean size (b) of Au NPs after spiking into ultrapure water, macerozyme R-10 enzyme treated and plant tissue. The values are given as mean±SD (standard deviation).

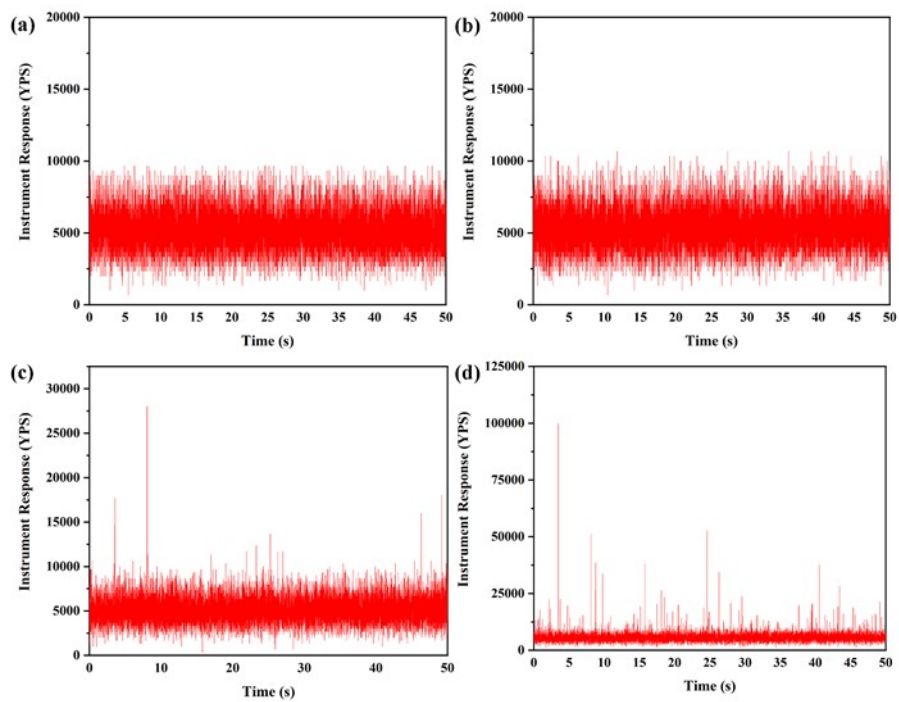

**Fig S6.** Raw peak data corresponding to Si-containing NPs detected in old leaves **(a)**, new leaves **(b)**, stems **(c)** and roots **(d)** of the control rice plant.

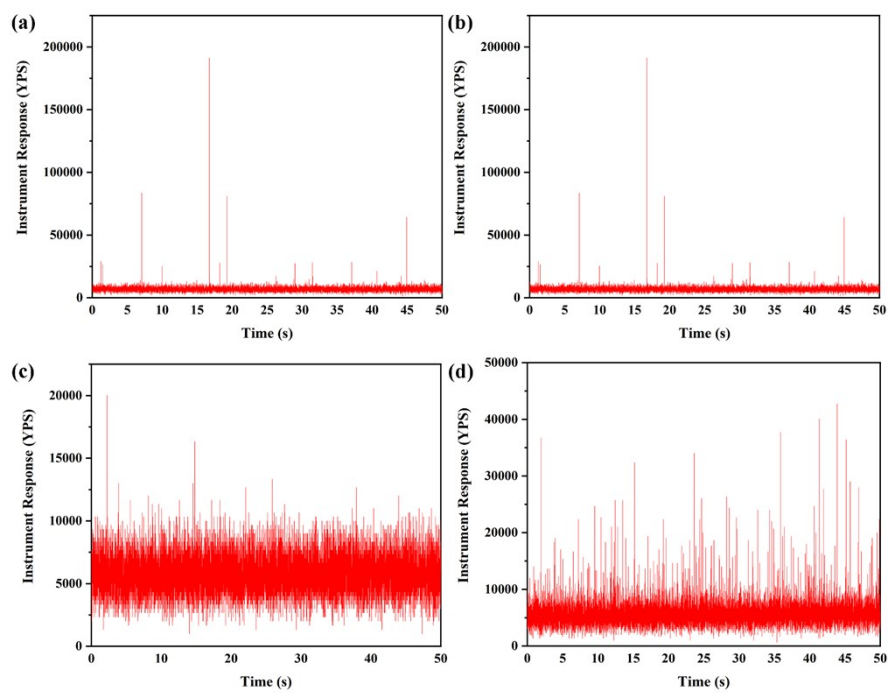

**Fig S7.** Raw peak data corresponding to Si-containing NPs detected in old leaves **(a)**, new leaves **(b)**, stems **(c)** and roots **(d)** of rice plant treated with SiO<sub>2</sub> NMs.

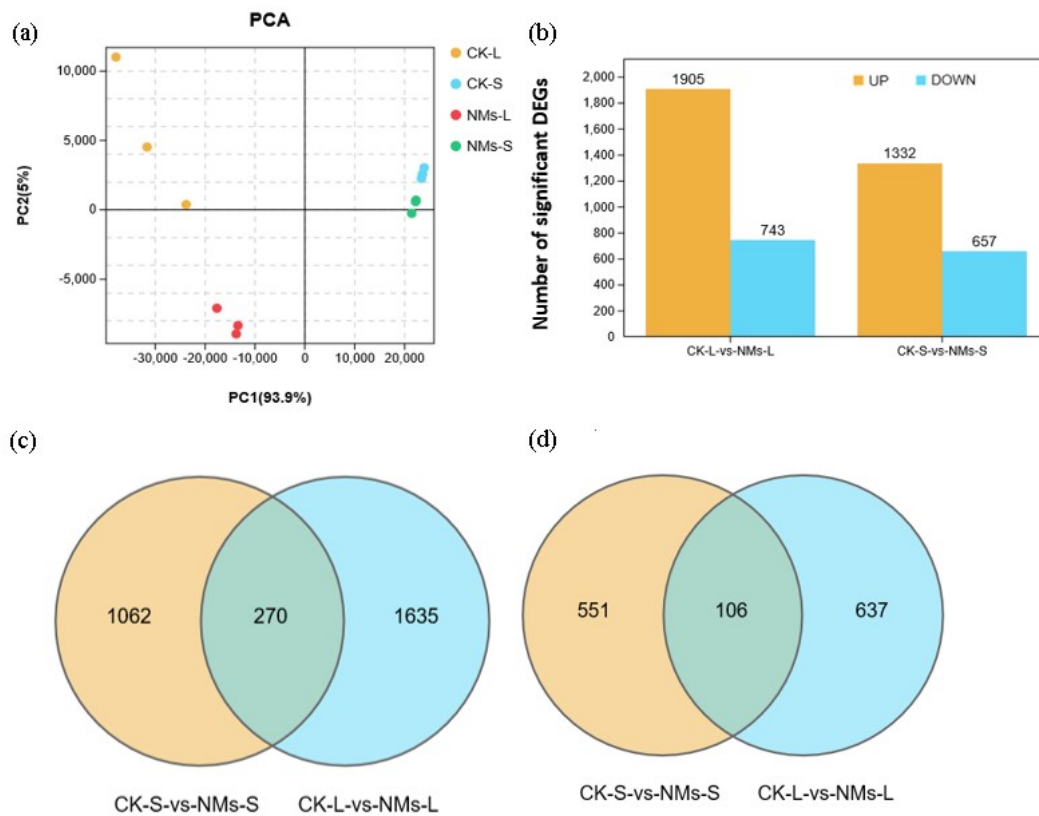

**Fig S8.** Overview of differential gene expression under SiO<sub>2</sub> NMs exposure. **(a)** PCA plot of global transcriptome profiles. **(b)** Numbers of differentially up- and downregulated genes between each group **(c, d)**: Venn diagram illustrating the number of genes up- or downregulated.  $Q < 0.05$  and  $|\text{Log}_2 \text{FC}| \geq 1$ .

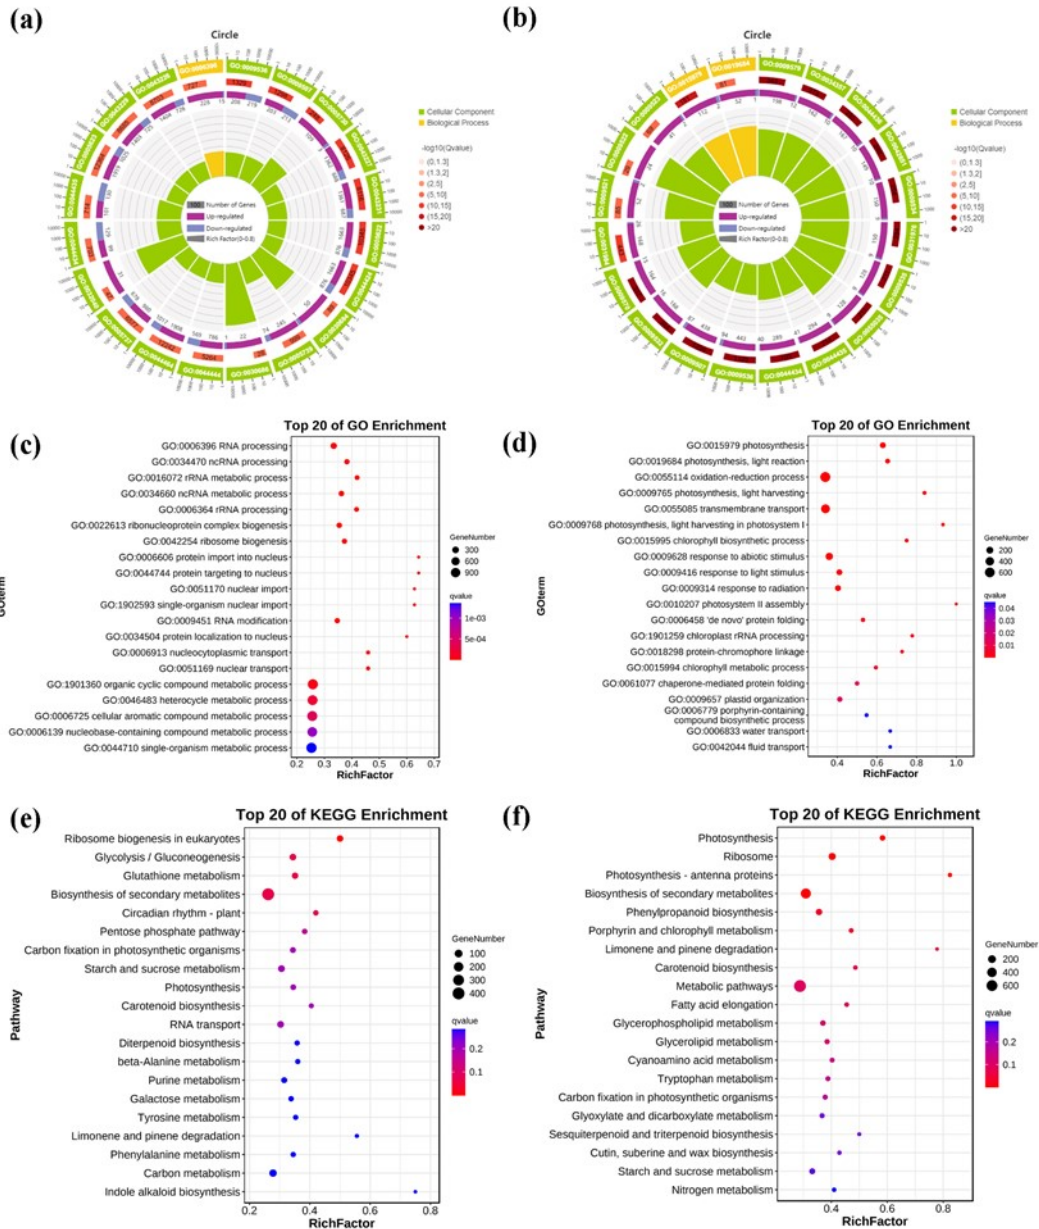

**Fig S9.** Transcriptomic analysis in rice leaves and stems. Gene ontology analysis of rice leaves **(a)** and stems **(b)** under  $\text{Na}_2\text{SiO}_3$  exposure. The results are categorized into three: biological process, molecular function and cellular component. GO enrichment analysis for  $\text{Na}_2\text{SiO}_3$  vs. CK in rice leaves **(c)** and stems **(d)**. KEGG enrichment analysis for  $\text{Na}_2\text{SiO}_3$  vs. CK in rice leaves **(e)** and stems **(f)**. The color and size of the dots indicate the  $q$  value and number of enriched DEGs, respectively.

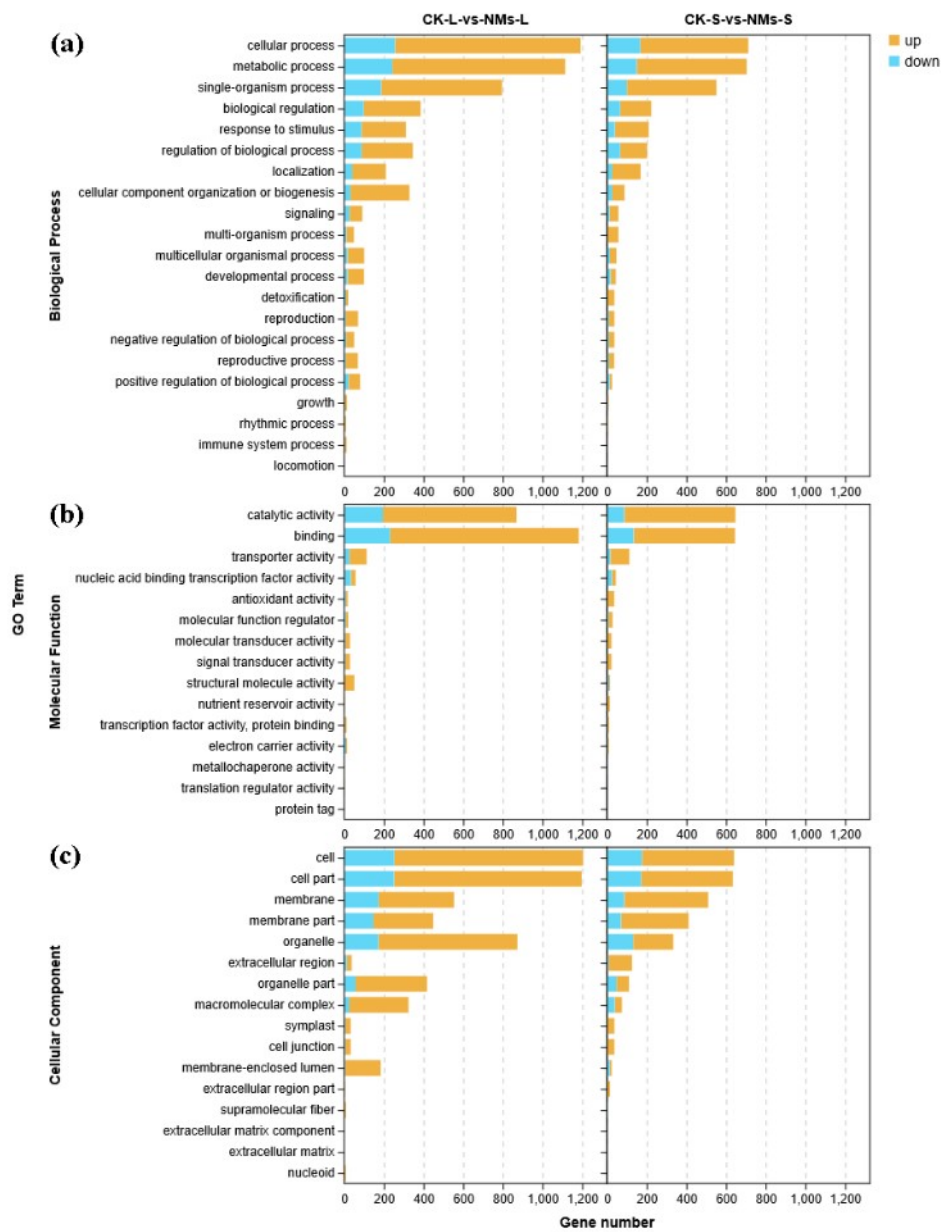

**Figure S10.** GO enrichment analysis of upregulated and downregulated DEGs in rice leaves and stems in response to SiO<sub>2</sub> NMs exposure.



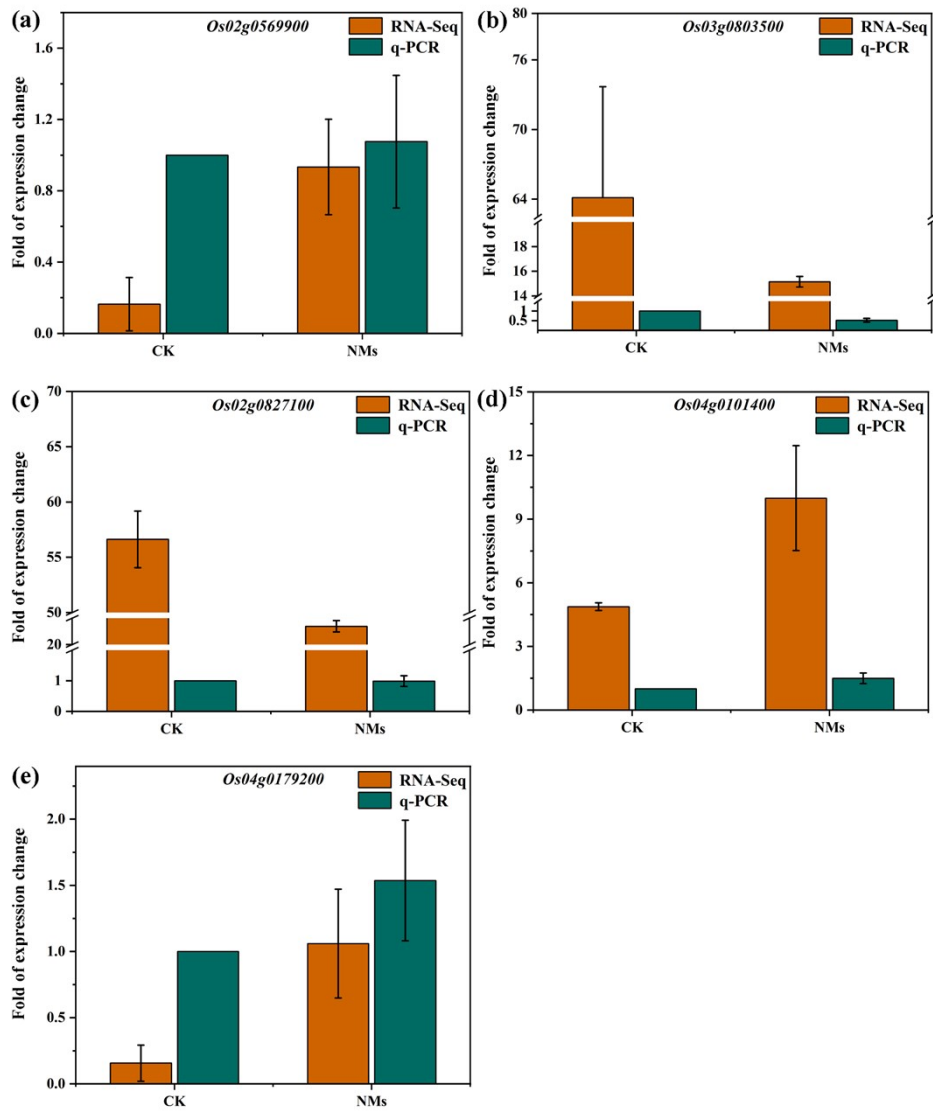

**Fig S11.** Verification of RNA-Seq expression by qRT-PCR. The orange bar column means the data in transcriptome analysis, and green indicates the data of q-PCR. The bars represent standard deviation.

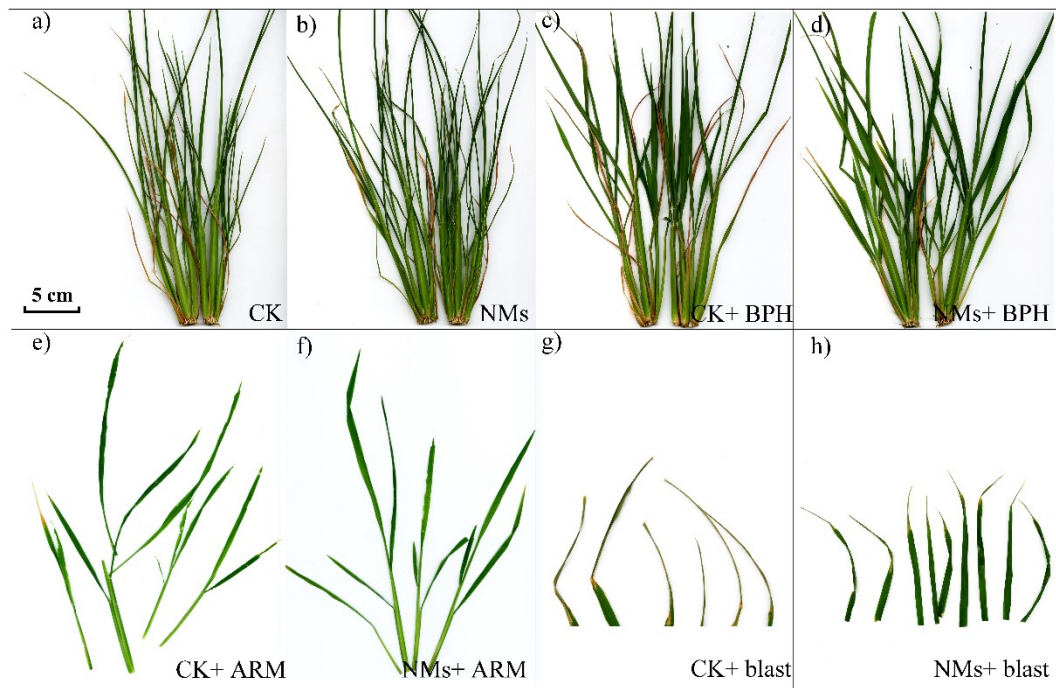

**Fig S12.** The increased constitutive resistance against insects and fungi by SiO<sub>2</sub> NMs. **(a-b)** Photos of rice grown without infestation by insects or fungi. **(c-d)** In the presence of BPH. **(e-f)** In the presence of ARM. **(g-h)** Infected with rice blast.

**Table S1.** Characteristics of particles used in this study

| <b>Particle</b>      | <b>Hydrodynamic diameter (nm)</b> | <b>Zeta potential (mV)</b> |
|----------------------|-----------------------------------|----------------------------|
| SiO <sub>2</sub> NMs | 284.9±40.9                        | 22.2±1.3                   |

**Table S2.** The specific primer sequences of five selected DEGs

| <b>Names (gene ID)</b> | <b>Forward sequence (5'-3')</b> | <b>Reverse sequence (3'-5')</b> |
|------------------------|---------------------------------|---------------------------------|
| <i>Os02g0569900</i>    | TACTACTGGCCTCCTCAACCT           | AGGAACGGGTAGAAAGTCGGA           |
| <i>Os03g0803500</i>    | AGCACGAGGACGACATTGTT            | AAGACTGGCTGGATCCGTTG            |
| <i>Os02g0827100</i>    | CCAGATGCCACTCTAGACCC            | TCACGGACATGCATCCACTT            |
| <i>Os04g0101400</i>    | GTGTTTCATCAACGTGTGGGC           | CCATGCACTGCCAATCGAAG            |
| <i>Os04g0179200</i>    | GAGGCAATCGAGGCGATCAT            | CCAAAGCTGCTGTTGACGAC            |

**Table S3.** Summary for the transcriptome of rice leaves and stems in response to SiO<sub>2</sub> NMs at one month using Illumina RNA-seq.

| <b>Sample</b>  | <b>Raw reads</b> | <b>Clean reads</b> | <b>Clean bases</b> | <b>Q20(%)</b> | <b>Q30(%)</b> | <b>GC content (%)</b> |
|----------------|------------------|--------------------|--------------------|---------------|---------------|-----------------------|
| <b>CK-L-1</b>  | 40398280         | 40180936(99.46%)   | 6.03G              | 97.74%        | 93.65%        | 51.65%                |
| <b>CK-L-2</b>  | 45528110         | 45311566(99.52%)   | 6.80G              | 97.96%        | 94.05%        | 52.01%                |
| <b>CK-L-3</b>  | 39665868         | 39480110(99.53%)   | 5.92G              | 97.95%        | 94.07%        | 51.87%                |
| <b>CK-S-1</b>  | 42494770         | 42303030(99.55%)   | 6.35G              | 97.80%        | 93.72%        | 48.95%                |
| <b>CK-S-2</b>  | 41710280         | 41512284(99.53%)   | 6.23G              | 97.82%        | 93.71%        | 49.08%                |
| <b>CK-S-3</b>  | 45980348         | 45745130(99.49%)   | 6.86G              | 97.85%        | 93.85%        | 49.10%                |
| <b>NMs-L-1</b> | 40284200         | 40077224(99.49%)   | 6.01G              | 97.63%        | 93.45%        | 51.13%                |
| <b>NMs-L-2</b> | 40701914         | 40436834(99.35%)   | 6.07G              | 97.57%        | 93.30%        | 51.43%                |
| <b>NMs-L-3</b> | 37340844         | 37140708(99.46%)   | 5.57G              | 97.35%        | 92.80%        | 51.31%                |
| <b>NMs-S-1</b> | 39456504         | 39262460(99.51%)   | 5.89G              | 97.71%        | 93.53%        | 50.24%                |
| <b>NMs-S-2</b> | 34601078         | 36214220(99.49%)   | 5.43G              | 97.68%        | 93.51%        | 50.48%                |
| <b>NMs-S-3</b> | 40309100         | 40112512(99.51%)   | 6.02G              | 97.65%        | 93.41%        | 50.48%                |
